# Supplementary material for: The dual life of disordered lysine-rich domains of snoRNPs in rRNA modification and nucleolar compaction
Source: PubMed Central journal article supplement (PMC11528048; doi:10.1038/s41467-024-53805-1), 2024-10-31
Supplement: 41467_2024_53805_MOESM1_ESM.pdf [file 41467_2024_53805_MOESM1_ESM.pdf]

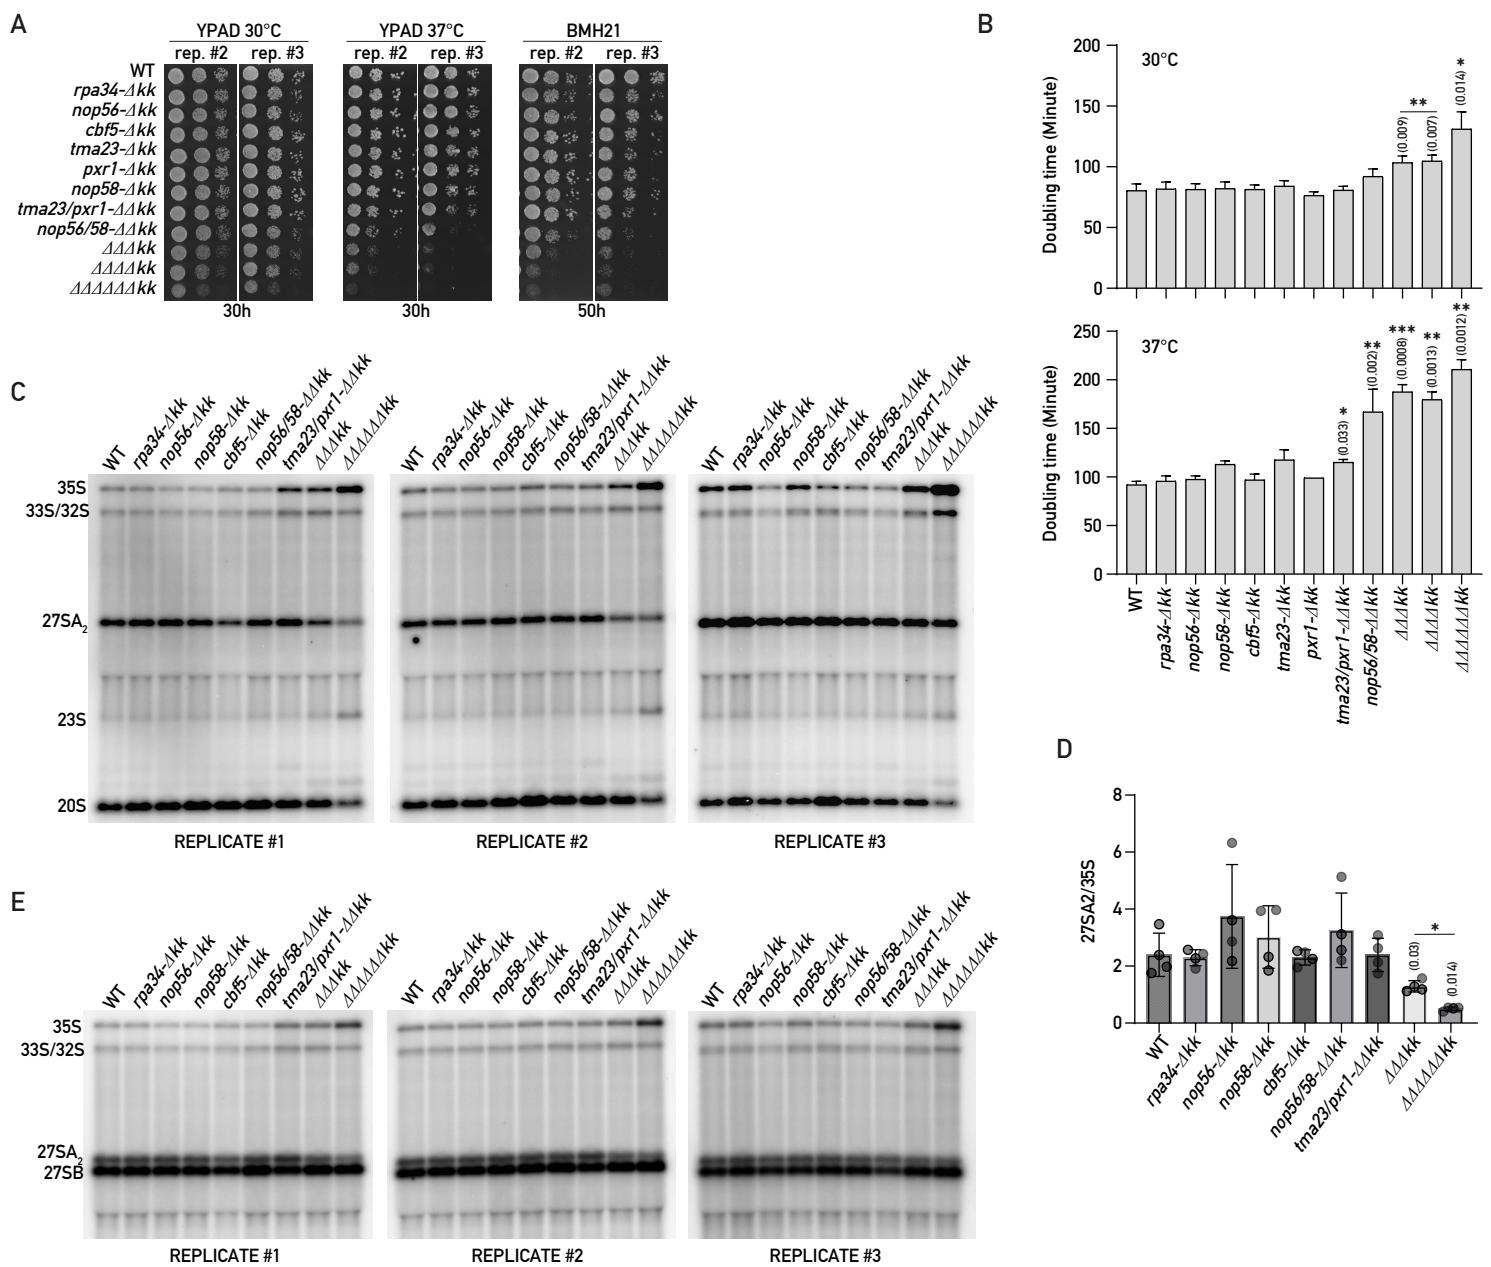

**Supplementary Figure 2: snoRNP KKE/D domains are collectively required for optimal growth, pre-rRNA processing and rRNA modification.**

(A) Two replicates (rep#1, #2) of tenfold serial dilutions of wild-type or mutant strains bearing individual or multiple deletions of KKE/D domains ( $-\Delta kk$ ) were grown in YPAD medium for 30 h at 30°C or 37°C or in the presence of a sub-lethal dose (15  $\mu$ M) of BMH-21 for 50 h. *rpa34- $\Delta kk$*  (*Rpa34*-(1-186)), *nop56- $\Delta kk$*  (*Nop56*-(1-441)), *cbf5- $\Delta kk$*  (*Cbf5*-(1-402)), *tma23- $\Delta kk$*  (*Tma23*-(1-141)), *pxr1- $\Delta kk$*  (*Pxr1*-(1-149)), *nop58- $\Delta kk$*  (*Nop58*-(1-438)),  $\Delta\Delta\Delta kk$  (*nop56- $\Delta kk$* , *nop58- $\Delta kk$* , *cbf5- $\Delta kk$* ),  $\Delta\Delta\Delta\Delta\Delta kk$  (*nop56- $\Delta kk$* , *nop58- $\Delta kk$* , *cbf5- $\Delta kk$* , *rpa34- $\Delta kk$* ),  $\Delta\Delta\Delta\Delta\Delta\Delta\Delta kk$  (*nop56- $\Delta kk$* , *nop58- $\Delta kk$* , *cbf5- $\Delta kk$* , *rpa34- $\Delta kk$* , *pxr1- $\Delta kk$* , *tma23- $\Delta kk$* ). (B) The doubling time of each strain has been measured in triplicate experiments by following the optic density ( $OD_{600}$ ) of liquid cultures in YPD at 30°C (top panel) or 37°C (bottom panel). A median of the three technical and biological replicates is shown. Unpaired two-tailed t-test analysis was used for statistics. Data are presented as mean values  $\pm$  SD. Significant differences are indicated by stars and with the p-value on the graph.  $n = 3$  biologically independent experiment. (C) Three technical and biological replicates of steady-state levels of rRNA precursors in the wild-type (WT) strain and the indicated KKE/D domain mutant strains. Total RNAs extracted from these strains were analyzed by Northern blotting using radiolabeled probes (23S.1 + 20S.3, Supplemental Data 8) detecting the indicated precursors. (D) Quantification of the northern blot signals obtained for the hybridizations shown in (C) using PhosphorImager data and the MultiGauge software. The histogram represents the 27SA<sub>2</sub>/35S ratio obtained in four technical and biological replicates in the wild-type (WT) strain and the indicated KKE/D domain mutant strains. Statistically significant differences were determined using unpaired two-tailed Student's t-test. Significant differences are indicated by stars and with the p-value on the graph.  $n = 4$  biologically independent experiment. (E) Three technical and biological replicates of steady-state levels of rRNA precursors in the wild-type (WT) strain and the indicated KKE/D domain mutant strains. Total RNAs extracted from these strains were analyzed by Northern blotting using the radiolabeled rRNA2.1 probe (Supplemental Data 8) detecting the indicated precursors.



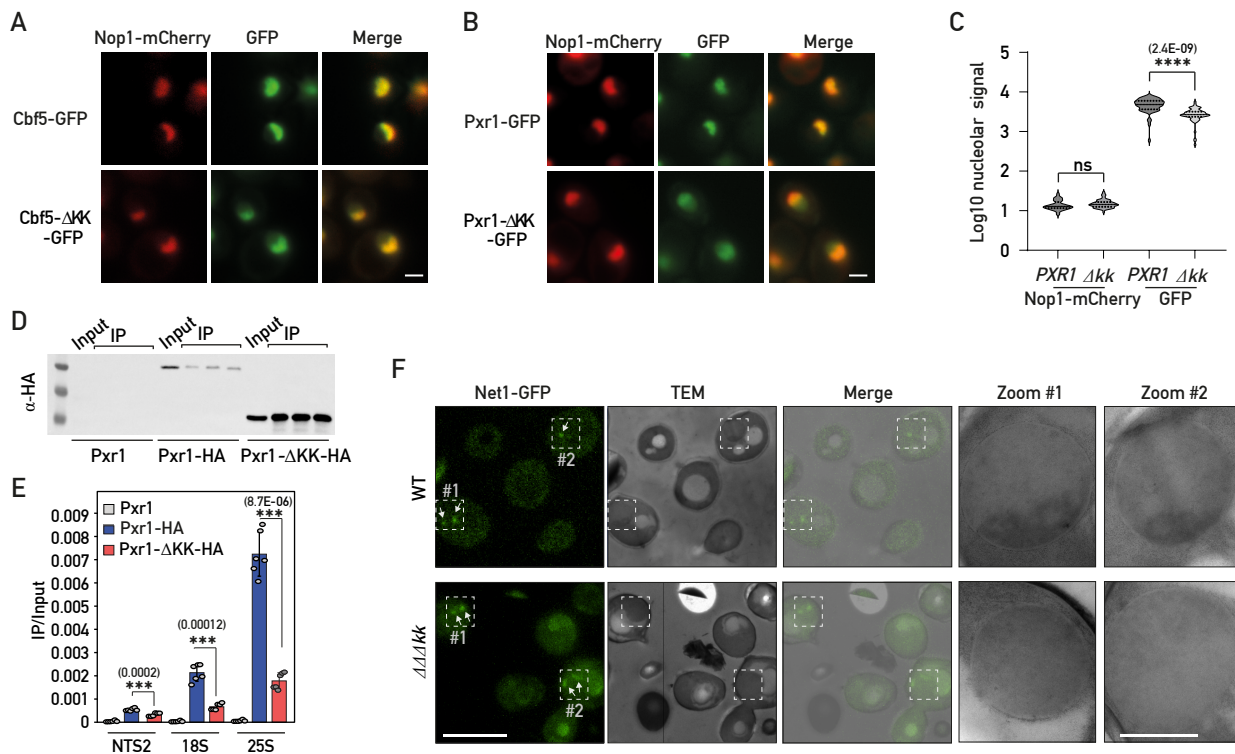

### Supplementary Figure 3: The KKE/D domain is essential for recruitment to the vicinity of rDNA genes.

**(A)** Fluorescence microscopy analyses of cells expressing Nop1-mCherry and either Cbf5-GFP or Cbf5-ΔKK-GFP. Merge: overlay of both fluorescent signals. Scale bar = 2 μm. **(B)** Same legend as in (A) for Pxr1-GFP or Pxr1-ΔKK-GFP. Scale bar = 2 μm. **(C)** Quantification of the nucleolar Nop1-mCherry and GFP signals (Log10) in *PXR1*-GFP (*PXR1*;  $n = 51$ ) and *pxr1-Δkk*-GFP (*Δkk*;  $n = 51$ ) strains.  $p$ -values were calculated with unpaired two-tailed Welch's t-test.  $n =$  number of cells pooled from 3 biologically independent replicates. **(D)** Western blot analysis using anti-HA antibodies showing the IP efficiencies of Pxr1 (no tag control), Pxr1-HA or Pxr1-ΔKK-HA in the ChIP-qPCR experiments shown in (E). Three technical IP replicates are shown for each condition as well as the corresponding input sample. **(E)** Pxr1 occupancy on rDNA genes at 18S, 25S or intergenic (NTS2) regions in strains expressing Pxr1 (no tag control providing the background binding), Pxr1-HA and Pxr1-ΔKK-HA evaluated by ChIP-qPCR. Immunoprecipitations were performed using anti-HA antibodies. DNA occupancy was defined as the ratio between the immunoprecipitation (IP) and the input signals measured by qPCR. Unpaired two-tailed t-test analysis was used for statistics. Data are presented as mean values  $\pm$  SD. Significant differences are indicated by stars and with the  $p$ -value on the graph.  $n = 6$  biologically independent experiment. **(F)** Representative images of wild-type (WT) or *cbf5-Δkk*, *nop56-Δkk*, *nop58-Δkk* (*ΔΔΔkk*) cells expressing Net1-GFP grown exponentially and analyzed for ultrastructural studies by Correlative Light and Electron Microscopy (CLEM) method using cryofixed, cryosubstituted cells. Representative sections of wild-type and mutant cell nuclei observed by fluorescence microscopy (Net1-GFP) are presented (left panel). Two specific WT or *ΔΔΔkk* nucleus sections showing Net1-GFP signal were next analyzed for ultrastructural studies by transmission electron microscopy (TEM, scale bar = 15 μm for Net1-GFP, TEM and Merge images). Merge: overlay of the fluorescent signals and TEM images. Zooms of the cells within the indicated dotted squares of TEM images are shown on the right (scale bar = 2 μm).

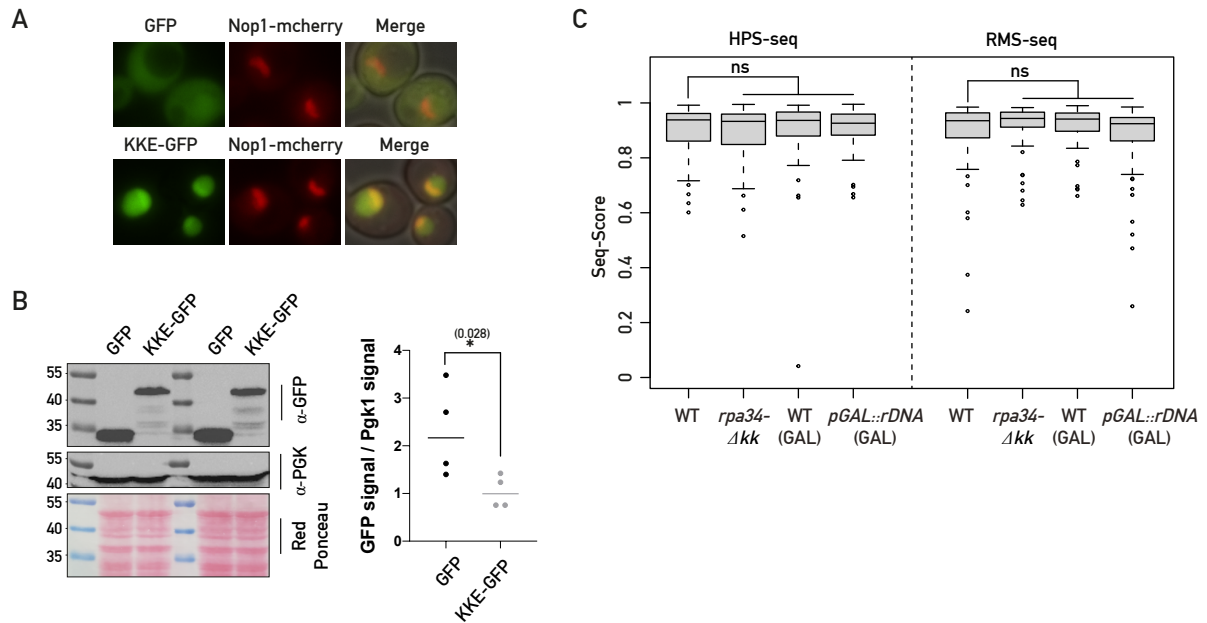

**Supplementary Figure 4: The KKE/D domain is sufficient to promote efficient targeting close to transcribed rDNA genes.**

(A) Strains expressing Nop1-mCherry and the KKE/D-GFP construct (KKE-GFP) or GFP alone were grown exponentially and cells were analyzed by fluorescence microscopy. (B) Western blotting experiments using anti-GFP antibodies and extracts from cells expressing the KKE/D-GFP construct (KKE-GFP) or GFP alone as in (A). The anti-Pgk1 signals and the staining of total proteins with Ponceau red served as loading controls. Right panel: quantification of GFP signals normalized by Pgk1 signals. Paired two-tailed t-test analysis was used for statistics. Significant differences are indicated by stars and with the *p*-value on the graph. *n* = 4 biologically independent experiment. (C) Density plots showing HPS scores (left panel) and RMS scores (right panel) for all rRNA modification sites (*n* = 47 for HydraPsi-Scores and *n* = 55 for RiboMeth-Score) in wild-type (WT) and *rpa34-Δkk* cells grown on glucose or in wild-type (WT (GAL)) and *rdn1Δ pGAL::rDNA rpa135Δ (pGAL::rDNA)* cells grown on galactose. These latter cells lack rDNA chromosomal repeats and the essential Rpa135 RNAPI subunit; they express rRNAs from a multicopy plasmid under the control of a galactose-inducible promoter (RNAPII). HydraPsi-Score (HPS-Score) and RiboMeth-Score indicate the fraction of uridine isomerisation and 2'-*O*-methylation at each rRNA modification site, respectively. *p*-values were calculated with unpaired two-samples Wilcoxon test (ns = no significance).

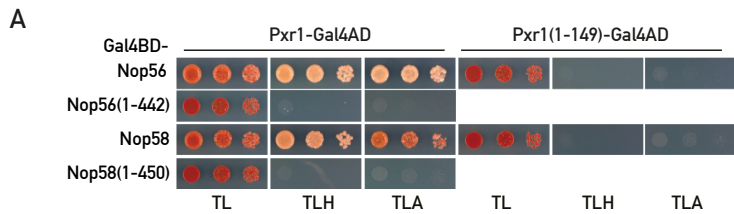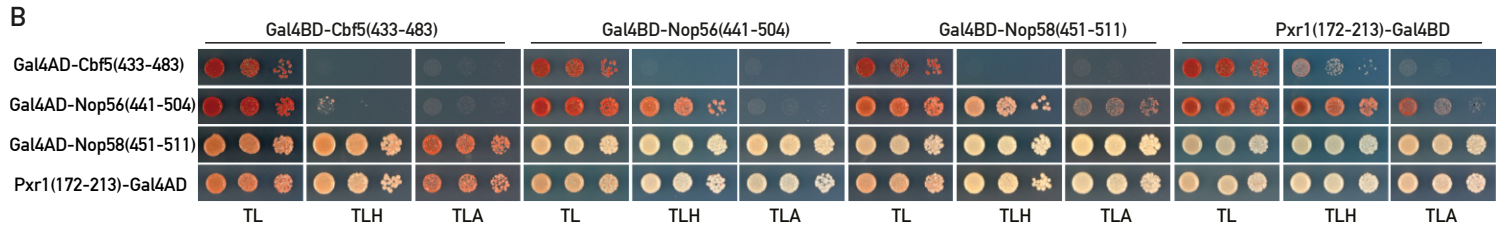

**Supplementary Figure 5: KKE/D domains interact in a homo- and heterotypic manner.**

(A) Y2H assays using the indicated combinations of the Gal4 DNA-binding domain (Gal4BD) fused to full-length Nop56, Nop56 lacking its KKE/D domain (Nop56(1-442)), full-length Nop58 or Nop58 lacking its KKE/D domain (Nop58(1-450)) and the Gal4 activation domain (Gal4AD) fused to full-length Pxr1 or Pxr1 lacking its KKE/D domain (Pxr1(1-149)).  $n = 3$  biologically independent experiment. (B) Y2H assays using the indicated combinations of the Gal4 DNA-binding domain (Gal4BD) fused to the KKE/D repeats of Cbf5 (Cbf5(433-483)), the KKE/D domain of Nop56 (Nop56(441-504)), the KKE/D domain of Nop58 (Nop58(451-511)), or the KKE/D repeats of Pxr1 (Pxr1(172-213)) and the Gal4 activation domain (Gal4AD) fused to the KKE/D repeats of Cbf5 (Cbf5(433-483)), the KKE/D domain of Nop56 (Nop56(441-504)), the KKE/D domain of Nop58 (Nop58(451-511)), or the KKE/D repeats of Pxr1 (Pxr1(172-213)).  $n = 3$  biologically independent experiment.



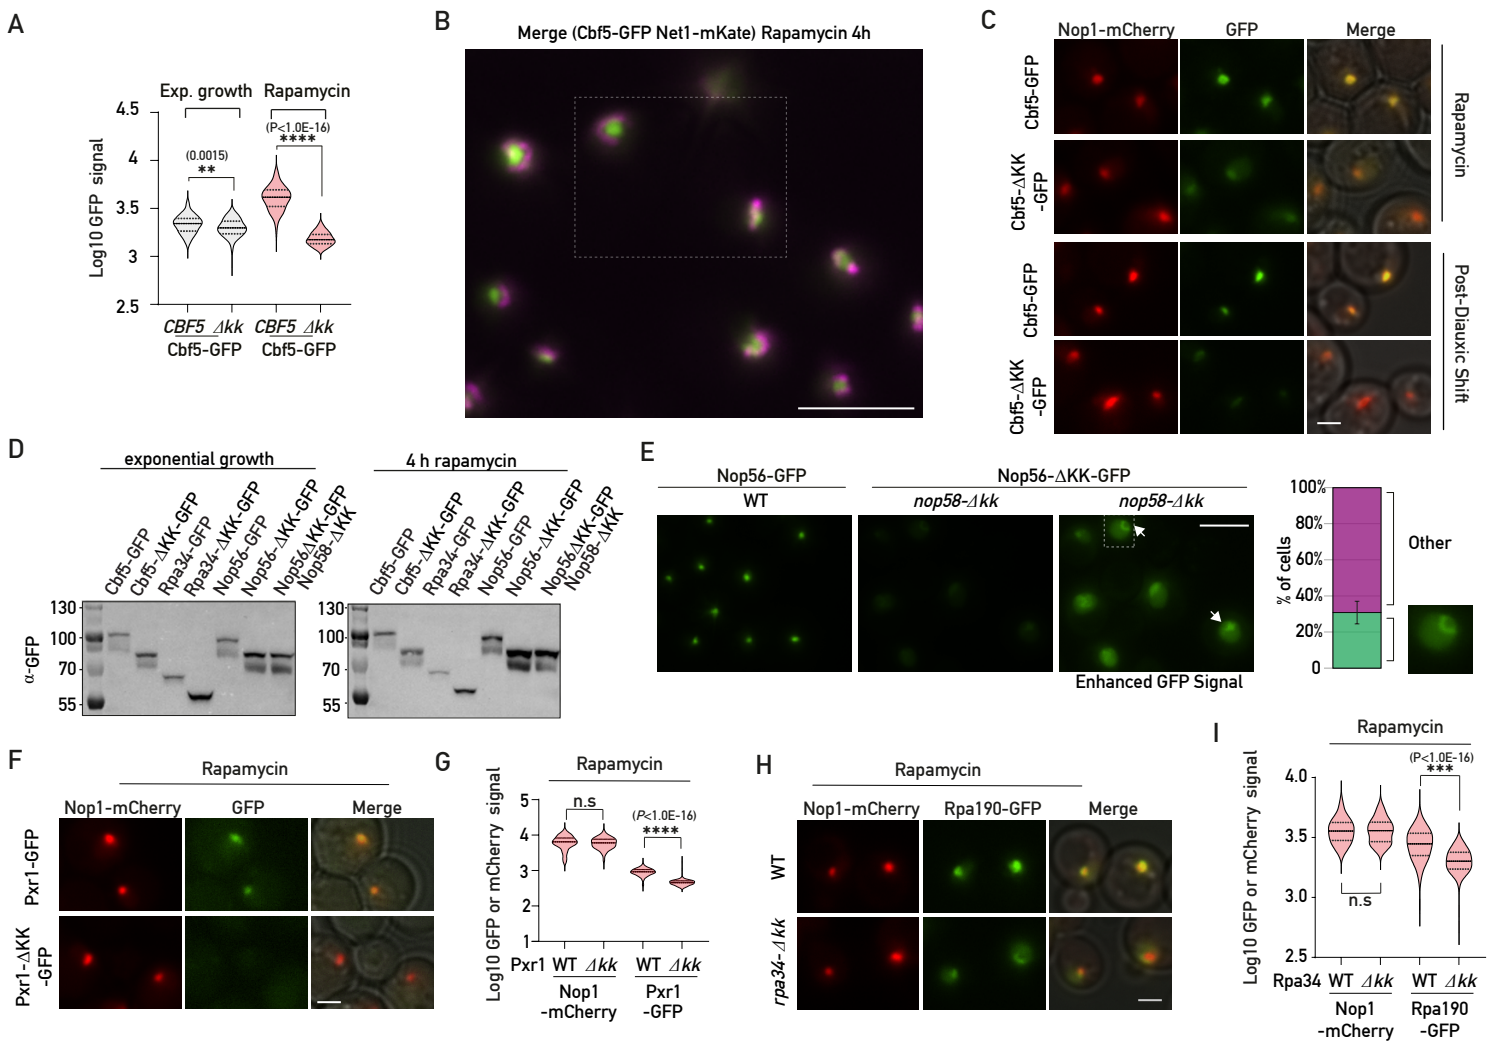

**Supplementary Figure 6: KKE/D domains are essential for nucleolar compaction and sequestration of associated factors in a specific subnucleolar area following TORC1 inactivation.**

(A) Quantification of maximum nuclear GFP and mKate signals (Log<sub>10</sub>) in rapamycin-treated ( $n = 120$ ) or untreated cells ( $n = 120$ ) described in Figure 6A. *CBF5*-GFP (*CBF5*) and *cbf5-Δkk*-GFP ( $\Delta kk$ ) cells expressing Net1-mKate were grown exponentially (Exp. growth) or treated for 4 h with rapamycin (Rapamycin).  $p$ -values were calculated with unpaired two-tailed Welch's t-test.  $n$  = number of cells pooled from 3 biologically independent replicates. (B) Fluorescence microscopy analyses of cells expressing Cbf5-GFP (Green) and Net1-mKate (Magenta) following rapamycin treatment. The dotted rectangle corresponds to the cells shown in Figure 6A. Scale bar = 5  $\mu$ m. (C) Fluorescence microscopy analyses of cells expressing Nop1-mCherry and either Cbf5-GFP or Cbf5- $\Delta$ KK-GFP treated with rapamycin (Rapamycin) or in the post-diauxic growth phase. Scale bar = 2  $\mu$ m. (D) Western blotting experiment using anti-GFP antibodies and protein extracts from cells expressing GFP-tagged versions of wild-type Cbf5 (Cbf5-GFP), Rpa34 (Rpa34-GFP) or Nop56 (Nop56-GFP), mutants lacking the KKE/D domain (Cbf5- $\Delta$ KK-GFP, Rpa34- $\Delta$ KK-GFP, Nop56- $\Delta$ KK-GFP) or mutants lacking the KKE/D domains of Nop56 and Nop58 ((Nop56- $\Delta$ KK-GFP Nop58- $\Delta$ KK)). Cells were grown exponentially (Exponential growth) or treated for 4 h with rapamycin (Rapamycin). (E) Fluorescence microscopy analyses of rapamycin-treated wild-type or *nop58-Δkk* cells expressing Nop56-GFP or Nop56- $\Delta$ KK-GFP as in Figure 6D. Scale bar = 5  $\mu$ m. 16-bit brightness levels have been increased to specifically visualize the GFP signal in *nop56-Δkk*-GFP *nop58-Δkk* cells (Enhanced GFP Signal). The percentage of cells ( $n = 120$ ) showing a circular GFP-depleted area pattern (arrow) in comparison to all other GFP patterns (Other) was manually counted in a series of four independent experiments. Such a GFP pattern is absent in all wild-type cells examined ( $n = 120$ ). Data are presented as mean values  $\pm$  SD. (F) Fluorescence microscopy analyses of cells expressing Nop1-mCherry and either Pxr1-GFP or Pxr1- $\Delta$ KK-GFP treated with rapamycin. Scale bar = 2  $\mu$ m. (G) Quantification of nucleolar Nop1-mCherry and GFP signals (Log<sub>10</sub>) in cells inspected in (F). (WT;  $n = 185$ ,  $\Delta kk$ ;  $n = 217$ ).  $p$ -values were calculated with unpaired two-tailed Welch's t-test.  $n$  = number of cells pooled from 3 biologically independent replicates. (H) Fluorescence microscopy analyses of rapamycin-treated wild-type (WT) or *rpa34-Δkk* cells expressing Nop1-mCherry and Rpa190-GFP. Scale bar = 2  $\mu$ m. (I) Quantification of nucleolar Nop1-mCherry and Rpa190-GFP signals (Log<sub>10</sub>) in cells inspected in (H). (WT;  $n = 176$ ,  $\Delta kk$ ;  $n = 138$ ).  $p$ -values were calculated with unpaired two-tailed Welch's t-test.  $n$  = number of cells pooled from 3 biologically independent replicates.

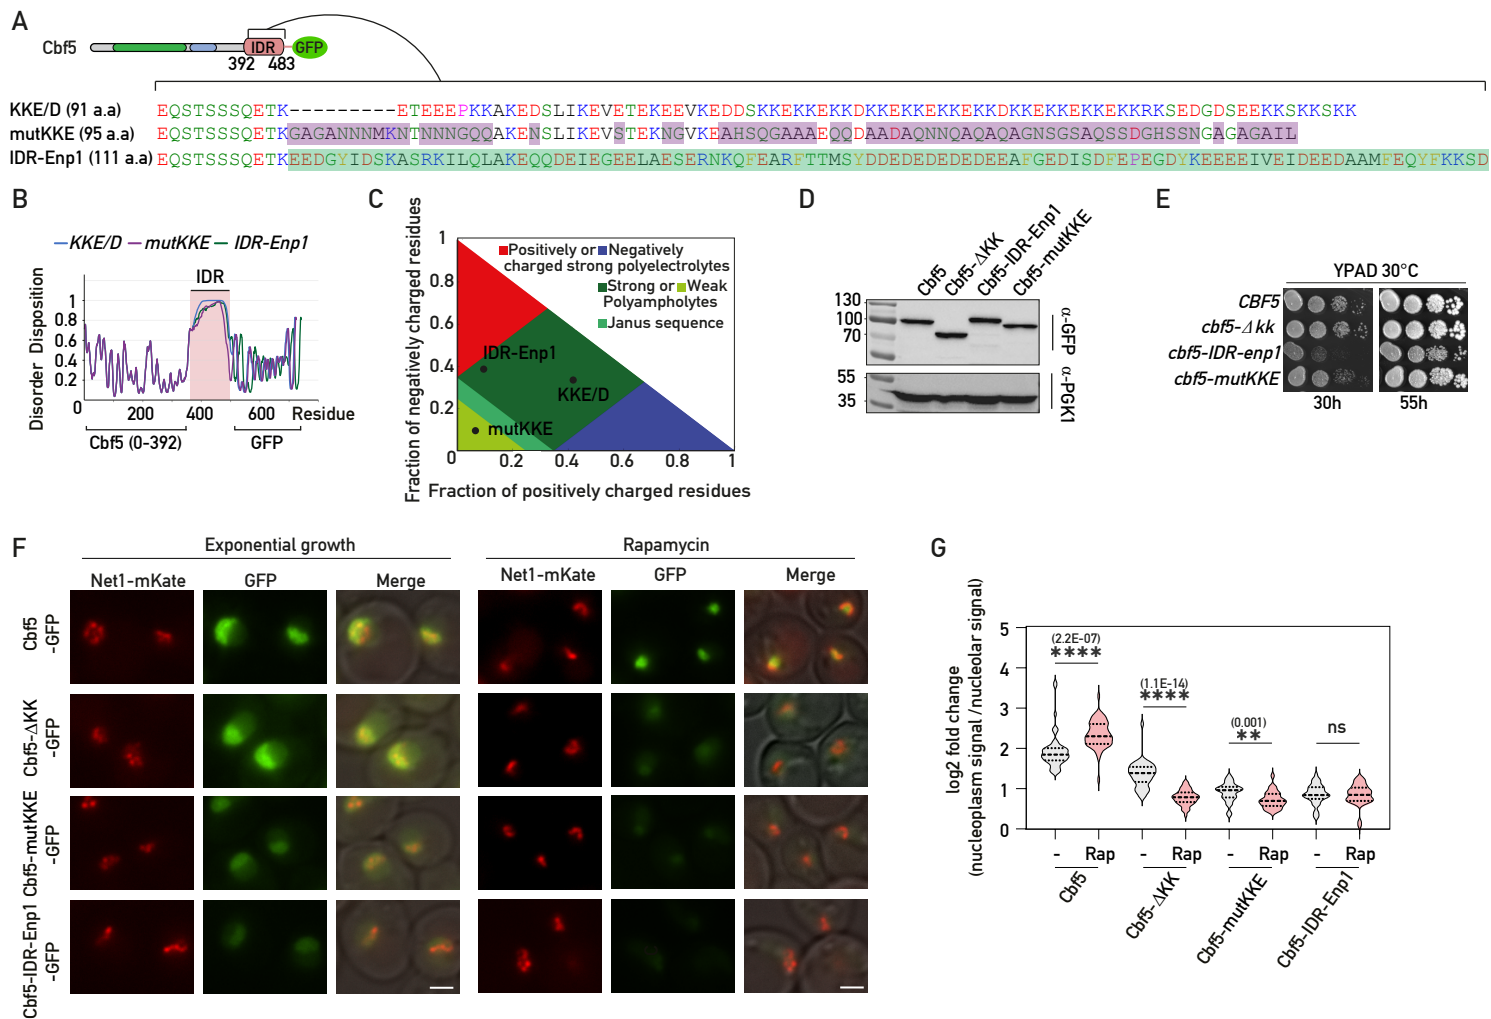

### Supplementary Figure 7: KKE/D domain has specific properties essential for nucleolar organization.

(A) Schematic representation of Cbf5 KKE/D domain mutations. The natural IDR sequence of Cbf5 and mutated sequences (IDR-*enp1* or *mutKKE*) are shown. Mutated IDRs were inserted in Cbf5 after amino acid 403 in place of the KKE/D domain. The magenta shaded areas in *mutKKE* indicate mutated residues. Most of the charged amino acids of the KKE/D domain have been replaced by G, A, Q, N or S residues to preserve the flexibility of this IDR and to avoid non-physiological large repetitions of similar amino acids. The green shaded area in the IDR-*enp1* sequence corresponds to the amino acid sequence 48-148 of the *Enp1* protein. (B) Prediction of disorder tendency of KKE/D mutants with PONDR (Peng et al., 2006). (C) Diagram of states for IDRs presented in A. (D) Western blotting experiment using anti-GFP or anti-Pgk1 antibodies and protein extracts from cells expressing wild-type Cbf5 (Cbf5), the truncated version lacking the KKE/D domain (Cbf5- $\Delta$ KK) or Cbf5 with mutated versions of the KKE/D domain (Cbf5-IDR-*Enp1*, Cbf5-*mutKKE*) fused to GFP. (E) Tenfold serial dilutions of wild-type cells expressing wild-type Cbf5 (*CBF5*), the truncated version lacking the KKE/D domain (*cbf5- $\Delta$ kk*) or Cbf5 with mutated versions of the KKE/D domain (*cbf5-IDR-*enp1**, *cbf5-*mutKKE**) fused to GFP grown in YPAD medium for 30 h or 55 h.  $n = 3$  biologically independent experiment. (F) Fluorescence microscopy analyses of untreated (Exponential growth) or rapamycin-treated (Rapamycin) cells expressing wild-type Cbf5 (Cbf5-GFP), the truncated version lacking the KKE/D domain (Cbf5- $\Delta$ KK-GFP) or Cbf5 with mutated versions of the KKE/D domain (Cbf5-IDR-*Enp1*-GFP, Cbf5-*mutKKE*-GFP) fused to GFP. Merge: overlay of fluorescent and transmission signals. Scale bars = 2  $\mu$ m. (G) Quantification of log<sub>2</sub> ratios between nucleolar and nucleoplasmic GFP signals in exponential growth (-) conditions (Cbf5 ( $n = 52$ ), Cbf5- $\Delta$ KK ( $n = 41$ ), Cbf5-*mutKKE* ( $n = 29$ ), Cbf5-IDR-*Enp1* ( $n = 40$ )) or following rapamycin (Rap) treatment (Cbf5 ( $n = 56$ ), Cbf5- $\Delta$ KK ( $n = 45$ ), Cbf5-*mutKKE* ( $n = 28$ ), Cbf5-IDR-*Enp1* ( $n = 36$ )).  $p$ -values were calculated with unpaired two-tailed Welch's t-test.  $n =$  number of cells pooled from 3 biologically independent replicates.

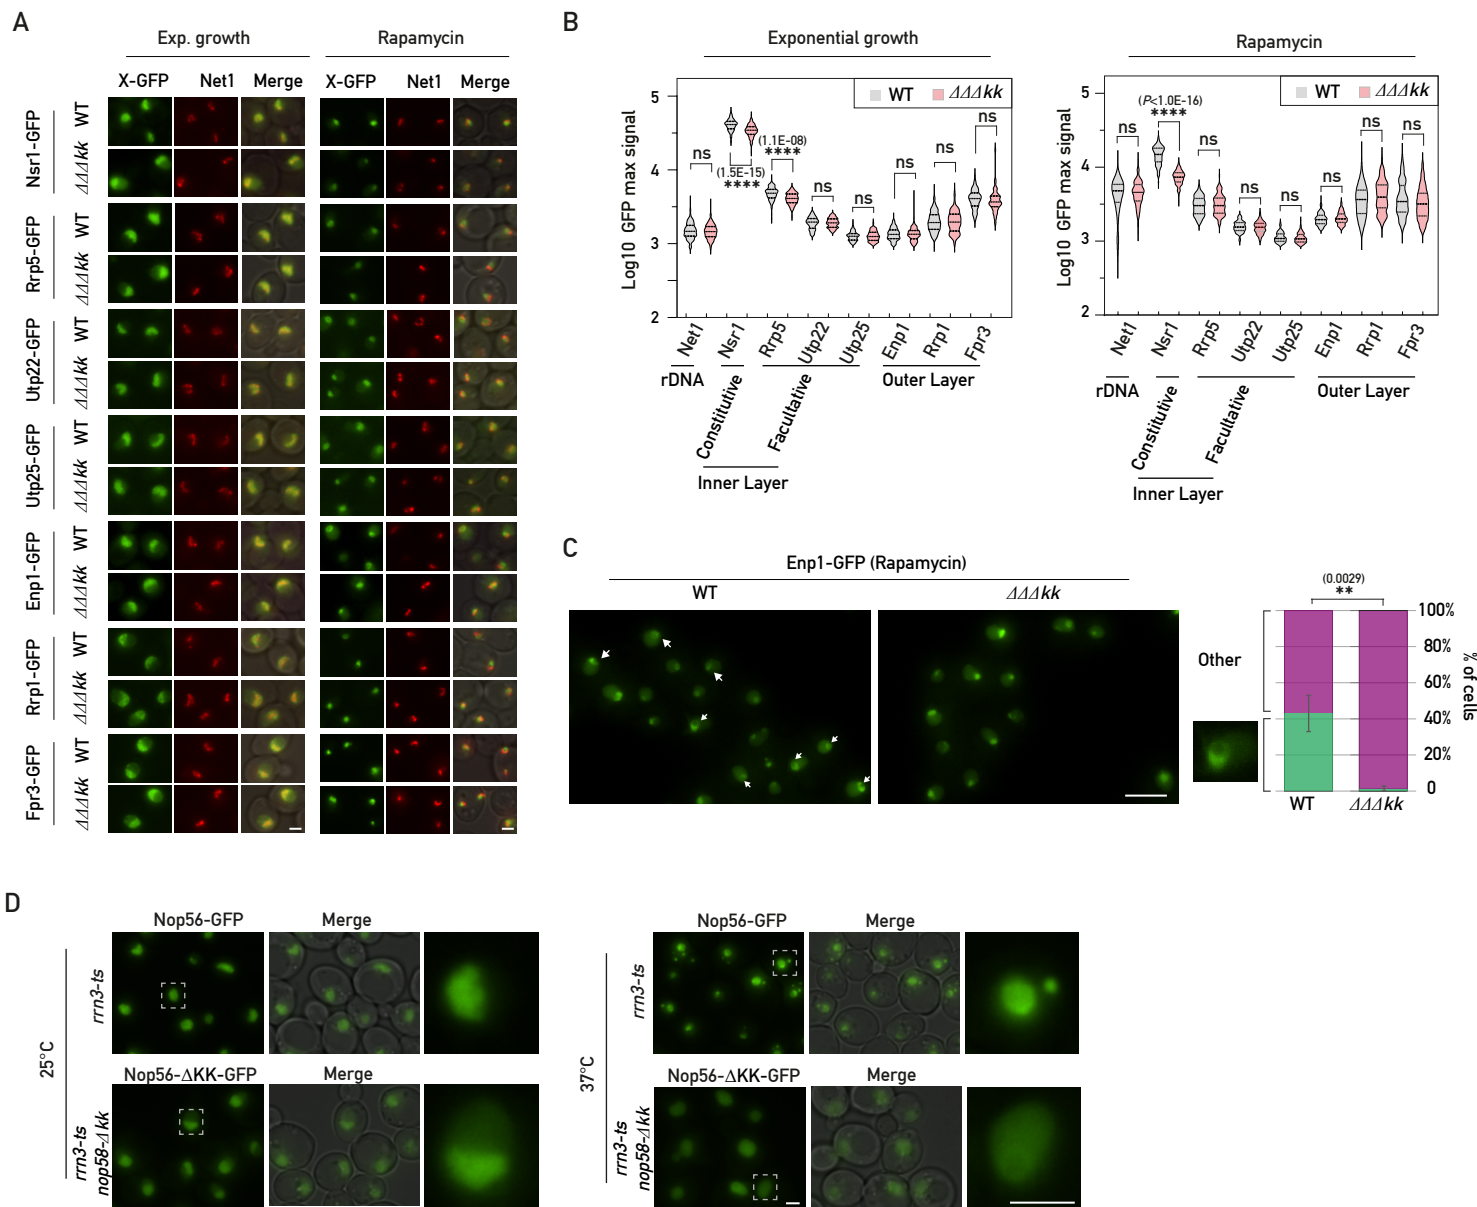

**Supplementary Figure 8: KKE/D domains are essential for nucleolar compaction and sequestration of associated factors in a specific subnucleolar area following TORC1 inactivation.**

(A) Fluorescence microscopy analyses of cells expressing Net1-mKate (rDNA staining) and the indicated proteins fused to GFP (X-GFP) grown exponentially (Exp. growth, left panel) or treated for 4 h with rapamycin to inactivate TORC1 (Rapamycin, right panel). Merge: overlay of fluorescent and transmission signals. Scale bars = 2  $\mu$ m. (B) Quantification of maximum nuclear GFP and mKate signals in rapamycin (Rap) treated cells (Net1 ( $n = 98$ ), Nsr1 ( $n = 136$ ), Rrp5 ( $n = 180$ ), Utp22 ( $n = 120$ ), Utp25 ( $n = 124$ ), Enp1 ( $n = 228$ ), Rrp1 ( $n = 101$ ), Fpr3 ( $n = 138$ ) or untreated (-) cells (Net1 ( $n = 248$ ), Nsr1 ( $n = 155$ ), Rrp5 ( $n = 114$ ), Utp22 ( $n = 99$ ), Utp25 ( $n = 144$ ), Enp1 ( $n = 248$ ), Rrp1 ( $n = 243$ ), Fpr3 ( $n = 116$ )) described in panel (A).  $p$ -values were calculated with unpaired two-tailed Welch's t-test.  $n$  = number of cells pooled from 3 biologically independent replicates. (C) Fluorescence microscopy analyses of rapamycin-treated wild-type or  $\Delta\Delta\Delta kk$  cells expressing Enp1-GFP. Scale bar = 5  $\mu$ m. The percentage of cells showing a circular GFP-depleted area pattern (arrows) in comparison to all other GFP patterns in both wild-type ( $n = 120$ ) or  $\Delta\Delta\Delta kk$  ( $n = 120$ ) cells was manually counted in a series of four independent experiments.  $p$ -values were calculated with unpaired two-tailed Welch's t-test. (D) Fluorescence microscopy analyses of *rrn3-ts* or *rrn3-ts nop58-Δkk* cells expressing Nop56-GFP or Nop56-ΔKK-GFP, respectively, grown exponentially at 25°C (active RNAPI) or shifted for 1 h to 37°C (inactive RNAPI, no rRNA production). Zooms of the GFP signals in the indicated dotted squares are shown on the right. Scale bar = 2  $\mu$ m.
